# Supplementary material for: Plasma biomarkers of Alzheimer’s disease improve prediction of cognitive decline in cognitively unimpaired elderly populations
Source: PubMed Central journal article supplement (PMC8196018; doi:10.1038/s41467-021-23746-0), 2021-06-11
Supplement: 41467_2021_23746_MOESM1_ESM.pdf [file 41467_2021_23746_MOESM1_ESM.pdf]

## Supplementary Materials

### **Plasma biomarkers of Alzheimer's disease improve prediction of cognitive decline in cognitively unimpaired elderly populations**

Nicholas C. Cullen, B.S.<sup>1</sup>, Antoine Leuzy, Ph.D.<sup>1</sup>, Shorena Janelidze, Ph.D.<sup>1</sup>, Sebastian Palmqvist, M.D.<sup>1,2</sup>, Anna L. Svenningsson, M.D.<sup>1,2</sup>, Erik Stomrud, M.D.<sup>1,2</sup>, Jeffrey L. Dage, Ph.D.<sup>3</sup>, Niklas Mattsson-Carlsson, M.D.<sup>1,4,5, †</sup>, Oskar Hansson, M.D.<sup>1,2, †</sup>

<sup>1</sup>Lund University, Clinical Memory Research Unit, Lund, Sweden; <sup>2</sup>Memory Clinic, Skåne University Hospital, Lund, Sweden; <sup>3</sup>Eli Lilly and Company, Indianapolis, IN, USA;

<sup>4</sup>Department of Neurology, Skåne University Hospital, Lund, Sweden; <sup>5</sup>Wallenberg Centre for Molecular Medicine, Lund University, Lund, Sweden

† Contributed equally as senior authors

## Supplementary Tables

### Supplementary Table 1. Association between plasma biomarkers and longitudinal

#### PACC with additional covariate adjustment for APOE e4 status

| Model | Beta Coefficient                             |                                       |                                       | R <sup>2</sup><br>[95% CI] | Ref: Basic Model |                  |
|-------|----------------------------------------------|---------------------------------------|---------------------------------------|----------------------------|------------------|------------------|
|       | Plasma<br>Aβ <sub>42</sub> /Aβ <sub>40</sub> | Plasma<br>P-tau <sub>217</sub>        | Plasma<br>NfL                         |                            | P value          | AIC <sub>Δ</sub> |
| ATN   | -0.15<br>[0.05, 0.24]<br>(P=0.0025)          | -0.15<br>[-0.25, -0.06]<br>(P=0.0020) | -0.12<br>[-0.21, -0.02]<br>(P=0.0142) | 0.15<br>[0.12, 0.17]       | <0.0001          | -28              |
| A     | -0.19<br>[0.09, 0.28]<br>(P=0.0001)          |                                       |                                       | 0.11<br>[0.09, 0.14]       | 0.0002           | -14              |
| T     |                                              | -0.20<br>[-0.30, -0.11]<br>(P<0.0001) |                                       | 0.10<br>[0.08, 0.13]       | 0.0001           | -14              |
| N     |                                              |                                       | -0.15<br>[-0.25, -0.06]<br>(P=0.0017) | 0.10<br>[0.09, 0.14]       | 0.0016           | -9               |

This table shows the results from fitting linear mixed effects models with longitudinal PACC as outcome and plasma biomarkers added separately or all together to a basic model consisting of age, sex, education, and APOE status. Beta coefficients are presented in terms of “PACC points / year per standard deviation change in biomarker value.” R<sup>2</sup> values were evaluated at the four-year follow-up point, and confidence intervals were calculated using 1000 bootstrapped samples. The basic model consisting of only demographics had R<sup>2</sup> = 0.07 (95% CI [0.07, 0.11]) and AIC = 6700. Legend: P-values represent an ANOVA comparison to the basic model; AIC<sub>Δ</sub> values represent the change in AIC compared to the basic model and an AIC<sub>Δ</sub> value of -2 or lower implies a better fit than the basic model. All statistical tests were two-sided with no adjustment for multiple comparisons.

**Supplementary Table 2. Association between plasma biomarkers and longitudinal**

**MMSE**

| Model | Beta Coefficient                          |                                       |                                       | R <sup>2</sup><br>[95% CI] | Ref: Basic Model |                  |
|-------|-------------------------------------------|---------------------------------------|---------------------------------------|----------------------------|------------------|------------------|
|       | Plasma Aβ <sub>42</sub> /Aβ <sub>40</sub> | Plasma P-tau <sub>217</sub>           | Plasma NfL                            |                            | P value          | AIC <sub>Δ</sub> |
| ATN   | -0.05<br>[-0.10, -0.01]<br>(P=0.0238)     | -0.06<br>[-0.11, -0.01]<br>(P=0.0122) | -0.07<br>[-0.12, -0.03]<br>(P=0.0026) | 0.10<br>[0.06, 0.11]       | <0.0001          | -21              |
| A     | -0.07<br>[-0.12, -0.03]<br>(P=0.0022)     |                                       |                                       | 0.06<br>[0.04, 0.07]       | 0.0015           | -10              |
| T     |                                           | -0.09<br>[-0.13, -0.04]<br>(P=0.0004) |                                       | 0.07<br>[0.03, 0.08]       | 0.001            | -10              |
| N     |                                           |                                       | -0.09<br>[-0.14, -0.04]<br>(P=0.0003) | 0.06<br>[0.03, 0.09]       | 0.001            | -10              |

This table shows the results from fitting linear mixed effects models with longitudinal MMSE as outcome and plasma biomarkers added separately or all together to a basic model consisting of age, sex, and education. Beta coefficients are presented in terms of “MMSE points / year per standard deviation change in biomarker value.” R<sup>2</sup> values were evaluated at the four-year follow-up point, and confidence intervals were calculated using 1000 bootstrapped samples. The basic model consisting of only demographics had R<sup>2</sup> = 0.04 (95% CI [0.02, 0.05]) and AIC = 4702. Legend: P-values represent an ANOVA comparison to the basic model; AIC<sub>Δ</sub> values represent the change in AIC compared to the basic model and an AIC<sub>Δ</sub> value of -2 or lower implies a better fit than the basic model. All statistical tests were two-sided with no adjustment for multiple comparisons.

**Supplementary Table 3. Association between plasma biomarkers and longitudinal****PACC with additional covariate adjustment for diagnostic status**

| Model | Beta Coefficient                      |                                       |                                       | R <sup>2</sup><br>[95% CI] | Ref: Basic Model |                  |
|-------|---------------------------------------|---------------------------------------|---------------------------------------|----------------------------|------------------|------------------|
|       | Plasma<br>Aβ42/Aβ40                   | Plasma<br>P-tau217                    | Plasma<br>NfL                         |                            | P value          | AIC <sub>Δ</sub> |
| ATN   | -0.14<br>[-0.24, -0.05]<br>(P=0.0029) | -0.16<br>[-0.25, -0.06]<br>(P=0.0011) | -0.13<br>[-0.23, -0.04]<br>(P=0.0056) | 0.22<br>[0.18, 0.26]       | <0.0001          | -30              |
| A     | -0.19<br>[-0.28, -0.09]<br>(P=0.0001) |                                       |                                       | 0.20<br>[0.16, 0.24]       | 0.0001           | -14              |
| T     |                                       | -0.21<br>[-0.30, -0.12]<br>(P<0.0001) |                                       | 0.18<br>[0.15, 0.22]       | 0.0001           | -15              |
| N     |                                       |                                       | -0.17<br>[-0.26, -0.07]<br>(P=0.0005) | 0.19<br>[0.15, 0.23]       | 0.0006           | -11              |

This table shows the results from fitting linear mixed effects models with longitudinal PACC as outcome and plasma biomarkers added separately or all together to a basic model consisting of age, sex, and education, along with additional adjustment for diagnostic status on both baseline and change in PACC. Beta coefficients are presented in terms of “PACC points / year per standard deviation change in biomarker value.” R<sup>2</sup> values were evaluated at the four-year follow-up point, and confidence intervals were calculated using 1000 bootstrapped samples. The basic model consisting of only demographics had R<sup>2</sup> = 0.17 (95% CI [0.13, 0.21]) and AIC = 6644. Legend: P-values represent an ANOVA comparison to the basic model; AIC<sub>Δ</sub> values represent the change in AIC compared to the basic model and an AIC<sub>Δ</sub> value of -2 or lower implies a better fit than the basic model. All statistical tests were two-sided with no adjustment for multiple comparisons.



**Supplementary Table 4. Association between CSF biomarkers and longitudinal PACC**

| Model | Beta Coefficient                      |                                       |                                       | R <sup>2</sup><br>[95% CI] | Ref: Basic Model |              |
|-------|---------------------------------------|---------------------------------------|---------------------------------------|----------------------------|------------------|--------------|
|       | Plasma<br>A $\beta$ 42/A $\beta$ 40   | Plasma<br>P-tau217                    | Plasma<br>NfL                         |                            | P value          | AIC $\Delta$ |
| ATN   | -0.26<br>[-0.34, -0.17]<br>(P<0.0001) | -0.20<br>[-0.30, -0.10]<br>(P=0.0001) | -0.20<br>[-0.30, -0.11]<br>(P<0.0001) | 0.25<br>[0.21, 0.28]       | <0.0001          | -98          |
| A     | -0.25<br>[-0.34, -0.16]<br>(P<0.0001) |                                       |                                       | 0.13<br>[0.11, 0.17]       | <0.0001          | -30          |
| T     |                                       | -0.28<br>[-0.37, -0.18]<br>(P<0.0001) |                                       | 0.14<br>[0.12, 0.17]       | <0.0001          | -34          |
| N     |                                       |                                       | -0.30<br>[-0.39, -0.21]<br>(P<0.0001) | 0.18<br>[0.14, 0.21]       | <0.0001          | -52          |

This table shows the results from fitting linear mixed effects models with longitudinal PACC as outcome and CSF biomarkers added separately or all together to a basic model consisting of age, sex, and education. Beta coefficients are presented in terms of “PACC points / year per standard deviation change in biomarker value.” R<sup>2</sup> values were evaluated at the four-year follow-up point, and confidence intervals were calculated using 1000 bootstrapped samples. The basic model consisting of only demographics had R<sup>2</sup> = 0.07 (95% CI [0.06, 0.11]) and AIC = 6699. Legend: P-values represent an ANOVA comparison to the basic model; AIC $\Delta$  values represent the change in AIC compared to the basic model and an AIC $\Delta$  value of -2 or lower implies a better fit than the basic model. All statistical tests were two-sided with no adjustment for multiple comparisons.

**Supplementary Table 5.** Association between plasma biomarkers and conversion to AD dementia with additional covariate adjustment for APOE e4 status

| Model | Hazard Ratio                        |                                    |                                    | AUC<br>[95% CI]      | Ref: Basic Model |              |
|-------|-------------------------------------|------------------------------------|------------------------------------|----------------------|------------------|--------------|
|       | Plasma<br>A $\beta$ 42/A $\beta$ 40 | Plasma<br>P-tau217                 | Plasma<br>NfL                      |                      | P value          | AIC $\Delta$ |
| ATN   | 1.57<br>[1.02, 2.43]<br>(P=0.0423)  | 2.71<br>[1.44, 5.10]<br>(P=0.0021) | 1.09<br>[0.67, 1.78]<br>(P=0.7202) | 0.86<br>[0.82, 0.93] | 0.0002           | -14          |
| A     | 1.69<br>[1.13, 2.55]<br>(P=0.0114)  |                                    |                                    | 0.81<br>[0.77, 0.89] | 0.0141           | -4           |
| T     |                                     | 2.99<br>[1.64, 5.48]<br>(P=0.0004) |                                    | 0.84<br>[0.75, 0.91] | 0.0001           | -13          |
| N     |                                     |                                    | 1.47<br>[0.95, 2.29]<br>(P=0.0859) | 0.79<br>[0.72, 0.89] | 0.0918           | -1           |

This table shows the results from fitting Cox regression models with conversion to AD as outcome and plasma biomarkers added separately or all together to a basic model consisting of age, sex, education, and APOE status. Hazard ratios are presented in terms of “increased risk of converting to AD for each standard deviation change in biomarker value.” AUC values were evaluated at the four-year follow-up point, and confidence intervals were calculated using 1000 bootstrapped samples. The basic model consisting of only demographics had AUC = 0.78 (95% CI [0.70, 0.91]) and AIC = 253. Legend: P-values represent an ANOVA comparison to the basic model; AIC $\Delta$  values represent the change in AIC compared to the basic model and an AIC $\Delta$  value of -2 or lower implies a better fit than the basic model. All statistical tests were two-sided with no adjustment for multiple comparisons.

**Supplementary Table 6. Association between plasma biomarkers and conversion to all-cause dementia**

| Model | Hazard Ratio                        |                                    |                                    | AUC<br>[95% CI]      | Ref: Basic Model |              |
|-------|-------------------------------------|------------------------------------|------------------------------------|----------------------|------------------|--------------|
|       | Plasma<br>A $\beta$ 42/A $\beta$ 40 | Plasma<br>P-tau217                 | Plasma<br>NfL                      |                      | P value          | AIC $\Delta$ |
| ATN   | 1.72<br>[1.22, 2.42]<br>(P=0.0019)  | 1.93<br>[1.21, 3.07]<br>(P=0.0055) | 1.25<br>[0.85, 1.85]<br>(P=0.2617) | 0.75<br>[0.68, 0.84] | <0.0001          | -21          |
| A     | 1.84<br>[1.34, 2.53]<br>(P=0.0002)  |                                    |                                    | 0.73<br>[0.67, 0.82] | 0.0002           | -11          |
| T     |                                     | 2.36<br>[1.50, 3.71]<br>(P=0.0002) |                                    | 0.72<br>[0.63, 0.82] | <0.0001          | -14          |
| N     |                                     |                                    | 1.54<br>[1.06, 2.24]<br>(P=0.0246) | 0.68<br>[0.60, 0.78] | 0.0274           | -3           |

This table shows the results from fitting Cox regression models with conversion to all-cause dementia as outcome and plasma biomarkers added separately or all together to a basic model consisting of age, sex, and education. Hazard ratios are presented in terms of “increased risk of converting to all-cause dementia for each standard deviation change in biomarker value.” AUC values were evaluated at the four-year follow-up point, and confidence intervals were calculated using 1000 bootstrapped samples. The basic model consisting of only demographics had AUC = 0.66 (95% CI [0.57, 0.75]) and AIC = 368. Legend: P-values represent an ANOVA comparison to the basic model; AIC $\Delta$  values represent the change in AIC compared to the basic model and an AIC $\Delta$  value of -2 or lower implies a better fit than the basic model. All statistical tests were two-sided with no adjustment for multiple comparisons.



**Supplementary Table 7. Association between plasma biomarkers and conversion to AD dementia with additional covariate adjustment for diagnostic status**

| Model | Hazard Ratio                        |                                    |                                    | AUC<br>[95% CI]      | Ref: Basic Model |              |
|-------|-------------------------------------|------------------------------------|------------------------------------|----------------------|------------------|--------------|
|       | Plasma<br>A $\beta$ 42/A $\beta$ 40 | Plasma<br>P-tau217                 | Plasma<br>NfL                      |                      | P value          | AIC $\Delta$ |
| ATN   | 1.76<br>[1.13, 2.75]<br>(P=0.0119)  | 3.27<br>[1.75, 6.11]<br>(P=0.0002) | 1.12<br>[0.64, 1.97]<br>(P=0.6808) | 0.92<br>[0.89, 0.95] | <0.0001          | -27          |
| A     | 1.90<br>[1.28, 2.82]<br>(P=0.0014)  |                                    |                                    | 0.89<br>[0.85, 0.93] | 0.0015           | -8           |
| T     |                                     | 3.83<br>[2.10, 6.97]<br>(P<0.0001) |                                    | 0.91<br>[0.87, 0.95] | <0.0001          | -24          |
| N     |                                     |                                    | 1.60<br>[1.00, 2.55]<br>(P=0.0493) | 0.86<br>[0.81, 0.91] | 0.0558           | -2           |

This table shows the results from fitting Cox regression models with conversion to AD as outcome and plasma biomarkers added separately or all together to a basic model consisting of age, sex, education, and *APOE* status, along with additional adjustment for diagnostic status. Hazard ratios are presented in terms of “increased risk of converting to AD for each standard deviation change in biomarker value.” AUC values were evaluated at the four-year follow-up point, and confidence intervals were calculated using 1000 bootstrapped samples. The basic model consisting of only demographics had AUC = 0.86 (95% CI [0.80, 0.92]) and AIC = 243. Legend: P-values represent an ANOVA comparison to the basic model; AIC $\Delta$  values represent the change in AIC compared to the basic model and an AIC $\Delta$  value of -2 or lower implies a better fit than the basic model. All statistical tests were two-sided with no adjustment for multiple comparisons.

**Supplementary Table 8. Power analysis for a theoretical clinical trial**

| <b>Trial Endpoint</b> | <b>Biomarker</b>                 | <b>Sample Size Reduction (%)</b> | <b>P-value</b> |
|-----------------------|----------------------------------|----------------------------------|----------------|
| Change in PACC        | Plasma A $\beta$ 42/A $\beta$ 40 | 45 [20, 63]                      | 0.0032         |
|                       | Plasma P-tau217                  | 47 [16, 65]                      | 0.0072         |
|                       | Plasma NfL                       | 41 [5, 63]                       | 0.028          |
|                       | Combined Model                   | 70 [54, 81]                      | < 0.001        |
| Conversion to AD      | Plasma A $\beta$ 42/A $\beta$ 40 | 48 [38, 56]                      | < 0.001        |
|                       | Plasma P-tau217                  | 50 [35, 60]                      | 0.0008         |
|                       | Plasma NfL                       | 24 [-10, 45]                     | 0.2096         |
|                       | Combined Model                   | 63 [53, 70]                      | < 0.001        |

This tables shows the reduction in sample size resulting from using plasma biomarkers for inclusion enrichment in theoretical clinical trials aimed at slowing decline in PACC or reducing risk of conversion to AD dementia in a CU population. Sample sizes were estimated for a clinical trial in which pre-defined cutoffs for each biomarker were used as a screening inclusion threshold. Sample size reductions presented in the table are for the enriched trial relative to a trial which does not use any biomarkers for screening/enrichment. Pre-defined threshold values are described in the methods section. Confidence intervals were derived using 1000 bootstrapped trials. All statistical tests were two-sided with no adjustment for multiple comparisons.

**Supplementary Table 9. Power analysis for a theoretical clinical trial in SCD****individuals only**

| <b>Trial Endpoint</b> | <b>Biomarker</b>                 | <b>Sample Size Reduction (%)</b> | <b>P-value</b> |
|-----------------------|----------------------------------|----------------------------------|----------------|
| Change in PACC        | Plasma A $\beta$ 42/A $\beta$ 40 | 51 [17, 75]                      | 0.0072         |
|                       | Plasma P-tau217                  | 44 [-10, 70]                     | 0.0976         |
|                       | Plasma NfL                       | 61 [25, 82]                      | 0.0096         |
|                       | Combined Model                   | 73 [53, 87]                      | < 0.001        |
| Conversion to AD      | Plasma A $\beta$ 42/A $\beta$ 40 | 48 [37, 58]                      | < 0.001        |
|                       | Plasma P-tau217                  | 45 [25, 58]                      | 0.004          |
|                       | Plasma NfL                       | 29 [-10, 50]                     | 0.1528         |
|                       | Combined Model                   | 61 [50, 70]                      | < 0.001        |

This tables shows the reduction in sample size resulting from using plasma biomarkers for inclusion enrichment in theoretical clinical trials aimed at slowing decline in PACC or reducing risk of conversion to AD dementia in a CU population which has already been screened for subjective cognitive decline (SCD). Sample sizes were estimated for a clinical trial in which pre-defined cutoffs for each biomarker were used as a screening inclusion threshold. Sample size reductions presented in the table are for the enriched trial relative to a trial which does not use any biomarkers for screening/enrichment. Pre-defined threshold values are described in the methods section. Confidence intervals were derived using 1000 bootstrapped trials. All statistical tests were two-sided with no adjustment for multiple comparisons.

## Supplementary Figures

### Supplementary Figure 1. Relationship between plasma biomarkers

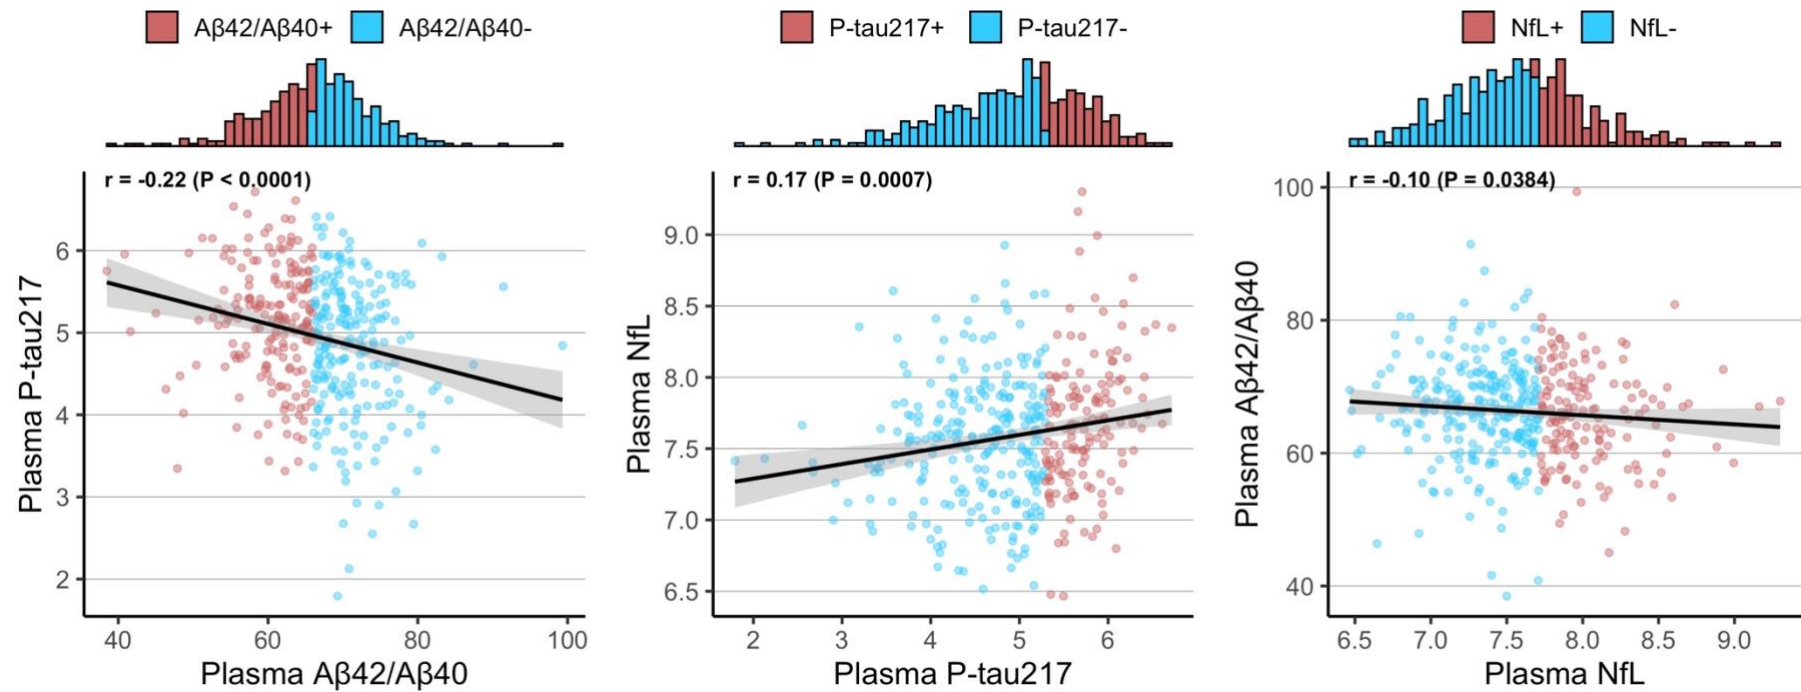

This figure shows the relationship between each pair of plasma biomarkers in the study population. All biomarkers were natural log-transformed and statistical associations were tested using Spearman correlation. The upper panels show the histogram distributions for each corresponding biomarker labelled on the x-axis and each individual is colored based on biomarker status (positive or negative; defined using pre-defined

cutoffs) for the biomarker on the x-axis. All statistical tests were two-sided with no adjustment for multiple comparisons. Shaded areas represent 95% confidence intervals of the regression lines.

**Supplementary Figure 2. Relationship between plasma biomarkers and change in MMSE**

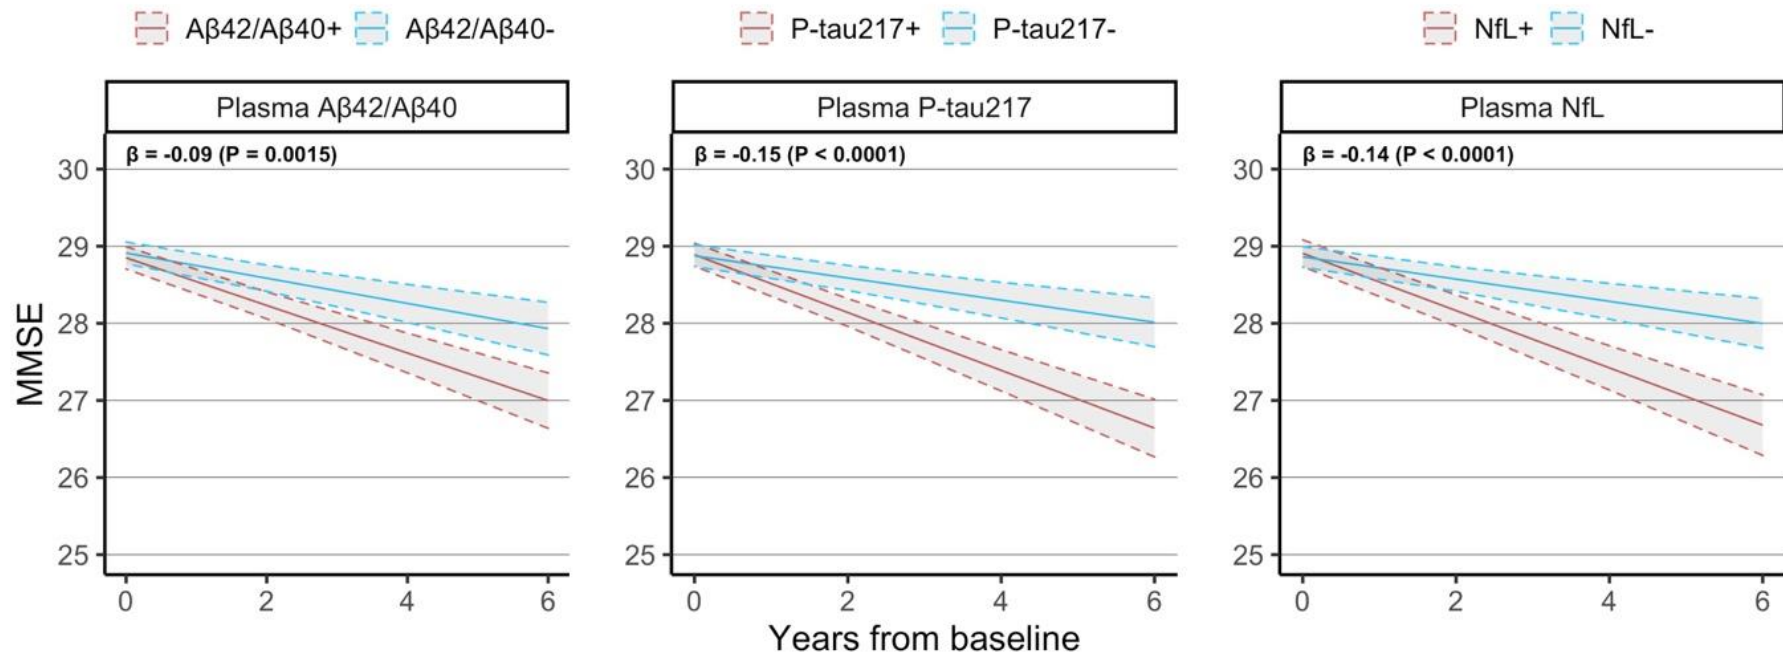

This figure shows the longitudinal MMSE trajectory estimated for a CU individual with average age, average education, female sex and either biomarker-negative or biomarker-positive. Beta coefficients at the top left of each panel are presented in terms of “points / year per standard deviation change in biomarker value” and are derived from linear mixed effects models with longitudinal MMSE as outcome and age, sex,

education, plus each plasma biomarker included separately from each other. All statistical tests were two-sided with no adjustment for multiple comparisons. Shaded areas represent 95% confidence intervals of the regression lines.

**Supplementary Figure 3. Relationship between plasma biomarkers and conversion to all-cause dementia**

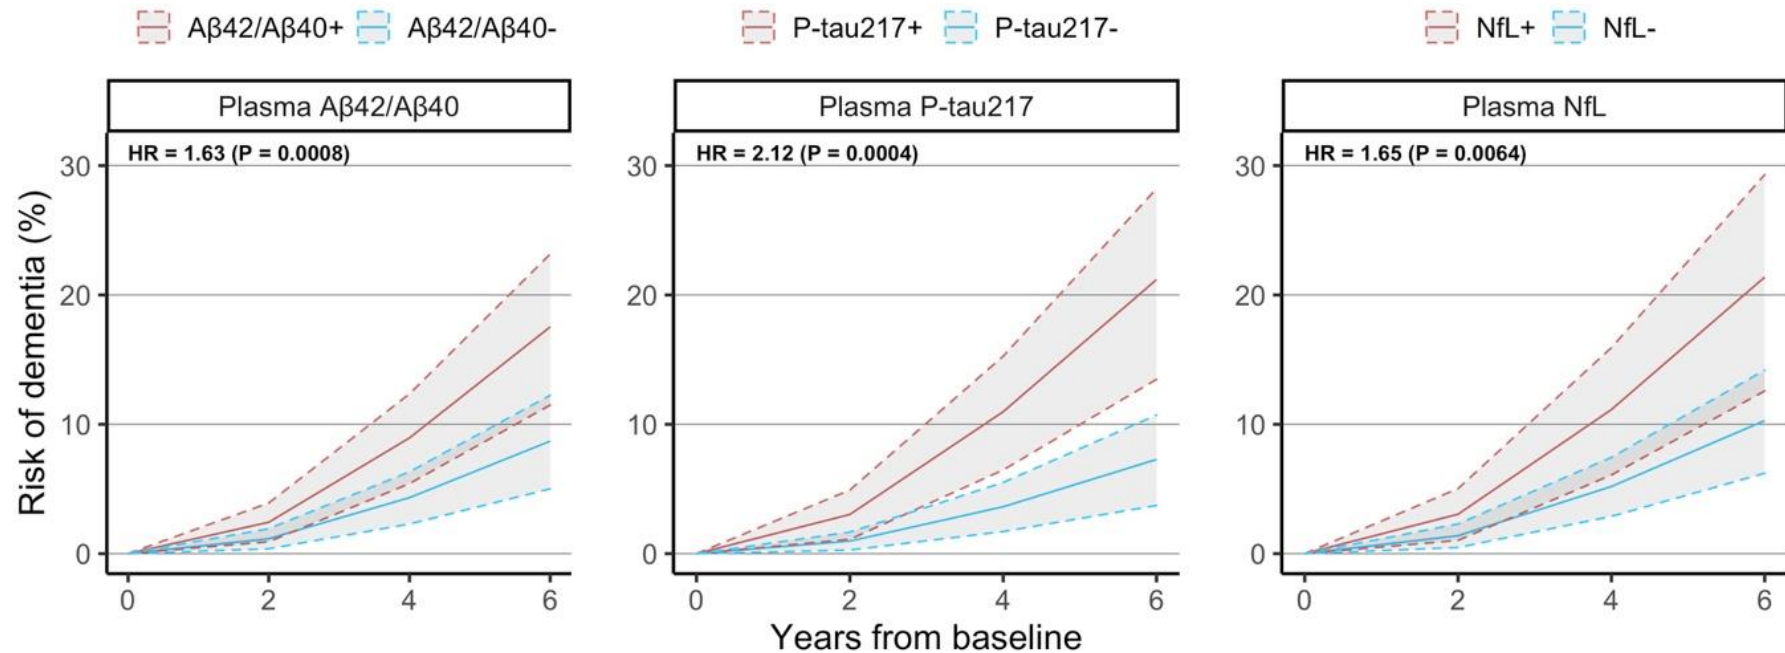

This figure shows the conversion to all-cause dementia estimated for a CU individual with average age, average education, female sex and either biomarker-negative or biomarker-positive. Hazard ratios at the top left of each panel are presented in terms of “increased risk of converting to all-cause dementia per standard deviation change in biomarker value” and are derived from Cox regression models with conversion to all-cause dementia as outcome and age, sex, education, plus each plasma biomarker included separately from each other. All statistical tests were two-sided with no adjustment for multiple comparisons. Shaded areas represent 95% confidence intervals of the regression lines.
